# Supplementary material for: How Did Italian Adolescents with Disability and Parents Deal with the COVID-19 Emergency?
Source: Int J Environ Res Public Health. 2021 Feb 10;18(4):1687. doi: 10.3390/ijerph18041687 (PMC7916390; doi:10.3390/ijerph18041687)
Supplement: Supplementary file 1 [file ijerph-18-01687-s001.pdf]

**Supplementary Table S1.** Parent survey

|                                                                                             |                                |
|---------------------------------------------------------------------------------------------|--------------------------------|
| 1. Age                                                                                      | < 35 y.o.                      |
|                                                                                             | 35-55 y.o.                     |
|                                                                                             | > 55 y.o.                      |
| 2. Sex                                                                                      | Male                           |
|                                                                                             | Female                         |
| 3. How many people are there in your family?                                                | Two/ Three/ Four / Five        |
|                                                                                             | Six                            |
| 4. How many children do you have?                                                           | Two/ Three/ Four               |
|                                                                                             | Five or more                   |
| 5. How many children with disability do you have?                                           | One / Two/ Three               |
|                                                                                             | >Three                         |
| 6. Sex of the first disabled child                                                          | Male                           |
|                                                                                             | Female                         |
| 7. Age of the first disabled child                                                          | < 6 y.o.                       |
|                                                                                             | 6-10 y.o.                      |
|                                                                                             | 11-13 y.o.                     |
|                                                                                             | 14-22 .o.                      |
|                                                                                             | > 22 y.o.                      |
| 8. Type of disability of the first disabled child<br>(multiple answers allowed)             | Motor disability               |
|                                                                                             | Cognitive disability           |
|                                                                                             | Motor and cognitive disability |
|                                                                                             | Visual disability              |
|                                                                                             | Hearing disability             |
|                                                                                             | Autism spectrum disorder       |
| 9. Sex of the second disabled child<br>(optional)                                           | Male                           |
|                                                                                             | Female                         |
| 10. Age of the second disabled child<br>(optional)                                          | < 6 y.o.                       |
|                                                                                             | 6-10 y.o.                      |
|                                                                                             | 11-13 y.o.                     |
|                                                                                             | 14-23 .o.                      |
|                                                                                             | > 22 y.o.                      |
| 11. Type of disability of the second disabled child<br>(optional; multiple answers allowed) | Motor disability               |
|                                                                                             | Cognitive disability           |
|                                                                                             | Motor and cognitive disability |
|                                                                                             | Visual disability              |
|                                                                                             | Hearing disability             |
|                                                                                             | Autism spectrum disorder       |
| 12. Sex of the third disabled child<br>(optional)                                           | Male                           |
|                                                                                             | Female                         |

|                                                                                                                              |                                                                             |
|------------------------------------------------------------------------------------------------------------------------------|-----------------------------------------------------------------------------|
| 13. Age of the third disabled child<br>(optional)                                                                            | < 6 y.o.                                                                    |
|                                                                                                                              | 6-10 y.o.                                                                   |
|                                                                                                                              | 11-13 y.o.                                                                  |
|                                                                                                                              | 14-24 .o.                                                                   |
|                                                                                                                              | > 22 y.o.                                                                   |
| 14. Type of disability of the third disabled child<br>(optional; multiple answers allowed)                                   | Motor disability                                                            |
|                                                                                                                              | Cognitive disability                                                        |
|                                                                                                                              | Motor and cognitive disability                                              |
|                                                                                                                              | Visual disability                                                           |
|                                                                                                                              | Hearing disability                                                          |
| 15. Which activities was your disabled child used to attend?<br>(multiple answers allowed)                                   | School                                                                      |
|                                                                                                                              | Sports or other recreational activities                                     |
|                                                                                                                              | Day-time community services                                                 |
|                                                                                                                              | Physiotherapy                                                               |
|                                                                                                                              |                                                                             |
| 16. Has the stopping of these activities induced any positive effect on daily life management?<br>(multiple answers allowed) | Yes, more time spending with relatives                                      |
|                                                                                                                              | Yes, more time to carry out daily life activities                           |
|                                                                                                                              | Yes, more time to take care of my child/children                            |
|                                                                                                                              | Yes, higher quality of family relationships                                 |
|                                                                                                                              | Yes, more participation in understanding my disabled child/children's needs |
|                                                                                                                              | Yes, other reasons                                                          |
| 17. Has the stopping of these activities induced any negative effect on daily life management?<br>(multiple answers allowed) | None                                                                        |
|                                                                                                                              | Yes, excessive burden of taking care of relatives staying at home all day   |
|                                                                                                                              | Yes, much stress caused by forced coexistence                               |
|                                                                                                                              | Yes, worrying about my child/children's disability                          |
|                                                                                                                              | Yes, other reasons                                                          |
| 18. How many rooms are there in your home, apart from the bathroom ?                                                         | None                                                                        |
|                                                                                                                              | One / Two / Three                                                           |
| 19. Considering the lockdown, do you think that spaces in your home are enough for an acceptable coexistence?                | Four or more                                                                |
|                                                                                                                              | Not at all                                                                  |
|                                                                                                                              | Little                                                                      |
|                                                                                                                              | Quite                                                                       |
| 20. What kind of job do you do?                                                                                              | A lot                                                                       |
|                                                                                                                              | Freelance                                                                   |
|                                                                                                                              | On a salary                                                                 |
|                                                                                                                              | Outside contractor                                                          |
|                                                                                                                              | Unemployed                                                                  |
|                                                                                                                              | Housewife                                                                   |

|                                                                                                                      |                              |
|----------------------------------------------------------------------------------------------------------------------|------------------------------|
| 21. Have you stopped working because of COVID-19 emergency?                                                          | Yes                          |
|                                                                                                                      | No                           |
|                                                                                                                      | Converted into smart working |
| 22. Does COVID-19 affect negatively your job?                                                                        | Not at all                   |
|                                                                                                                      | Little                       |
|                                                                                                                      | Quite                        |
|                                                                                                                      | A lot                        |
|                                                                                                                      | Extremely                    |
| 23. Have you experienced any financial difficulty since the beginning of COVID-19 emergency?                         | Yes                          |
|                                                                                                                      | No                           |
| 24. Do you know someone who contracted COVID-19?<br>(multiple answers allowed)                                       | Me                           |
|                                                                                                                      | One or more relatives        |
|                                                                                                                      | On or more colleagues        |
|                                                                                                                      | One or more acquaintances    |
|                                                                                                                      | No                           |
| 25. How much worried are you of contracting COVID-19?                                                                | Not at all                   |
|                                                                                                                      | Little                       |
|                                                                                                                      | Quite                        |
|                                                                                                                      | A lot                        |
|                                                                                                                      | Extremely                    |
| 26. In your opinion, how likely is it that one of your relatives can contract COVID-19?                              | Not at all                   |
|                                                                                                                      | Little                       |
|                                                                                                                      | Quite                        |
|                                                                                                                      | A lot                        |
|                                                                                                                      | Extremely                    |
| 27. How much do you think your relatives are worried of contracting COVID-19?                                        | Not at all                   |
|                                                                                                                      | Little                       |
|                                                                                                                      | Quite                        |
|                                                                                                                      | A lot                        |
|                                                                                                                      | Extremely                    |
| 28. Which of the following emotions do you feel when thinking about COVID-19?<br>(multiple answers allowed)          | Fear                         |
|                                                                                                                      | Anxiety                      |
|                                                                                                                      | Concern                      |
|                                                                                                                      | Sadness                      |
|                                                                                                                      | Anger                        |
| 29. How frequently have you felt more nervous and/or anxious thinking to your child's disability, in the past month? | Never                        |
|                                                                                                                      | Some days                    |
|                                                                                                                      | More than half the days      |
|                                                                                                                      | Nearly every day             |

|                                                                                                                      |                         |
|----------------------------------------------------------------------------------------------------------------------|-------------------------|
| 30. How frequently have you worried about supporting your child/children in schoolwork, in the past month?           | Never                   |
|                                                                                                                      | Some days               |
|                                                                                                                      | More than half the days |
|                                                                                                                      | Nearly every day        |
| 31. How frequently have you worried excessively about financial or job difficulties, in the past month?              | Never                   |
|                                                                                                                      | Some days               |
|                                                                                                                      | More than half the days |
|                                                                                                                      | Nearly every day        |
| 32. How frequently have you had troubles in managing your disabled child/children day life needs, in the past month? | Never                   |
|                                                                                                                      | Some days               |
|                                                                                                                      | More than half the days |
|                                                                                                                      | Nearly every day        |
| 33. How frequently have you felt stressed because of restricted spaces and seclusion in your home?                   | Never                   |
|                                                                                                                      | Some days               |
|                                                                                                                      | More than half the days |
|                                                                                                                      | Nearly every day        |
| 34. How frequently have you got easily irritated in your couple relationship, in the past month?                     | Never                   |
|                                                                                                                      | Some days               |
|                                                                                                                      | More than half the days |
|                                                                                                                      | Nearly every day        |
| 35. How frequently have you worried about managing family conflicts, in the past month?                              | Never                   |
|                                                                                                                      | Some days               |
|                                                                                                                      | More than half the days |
|                                                                                                                      | Nearly every day        |
| 36. How frequently have you experienced fear that something terrible could happen, in the past month?                | Never                   |
|                                                                                                                      | Some days               |
|                                                                                                                      | More than half the days |
|                                                                                                                      | Nearly every day        |
| 37. How frequently have you felt oppressed by a sense of boredom or emptiness, in the past month?                    | Never                   |
|                                                                                                                      | Some days               |
|                                                                                                                      | More than half the days |
|                                                                                                                      | Nearly every day        |
| 38. How frequently have you felt oppressed by a sense of loss or mourning, in the past month?                        | Never                   |
|                                                                                                                      | Some days               |
|                                                                                                                      | More than half the days |
|                                                                                                                      | Nearly every day        |
| 39. How frequently have you had difficulties in relaxing, in the past month?                                         | Never                   |
|                                                                                                                      | Some days               |
|                                                                                                                      | More than half the days |
|                                                                                                                      | Nearly every day        |

|                                                                                                                                                                                 |                                                                                                                      |
|---------------------------------------------------------------------------------------------------------------------------------------------------------------------------------|----------------------------------------------------------------------------------------------------------------------|
| 40. How frequently have you been agitated and unable to stay still, in the past month?                                                                                          | Never                                                                                                                |
|                                                                                                                                                                                 | Some days                                                                                                            |
|                                                                                                                                                                                 | More than half the days                                                                                              |
|                                                                                                                                                                                 | Nearly every day                                                                                                     |
| 41. How much worried are you about your child/children's future?                                                                                                                | Not at all                                                                                                           |
|                                                                                                                                                                                 | Little                                                                                                               |
|                                                                                                                                                                                 | Quite                                                                                                                |
|                                                                                                                                                                                 | A lot                                                                                                                |
|                                                                                                                                                                                 | Extremely                                                                                                            |
| 42. How much worried are you about your disabled child/children's future?                                                                                                       | Not at all                                                                                                           |
|                                                                                                                                                                                 | Little                                                                                                               |
|                                                                                                                                                                                 | Quite                                                                                                                |
|                                                                                                                                                                                 | A lot                                                                                                                |
|                                                                                                                                                                                 | Extremely                                                                                                            |
| 43. If you have more than one child, do you perceive any difference in your worrying about your disabled child compared to the other/s?<br>(optional; multiple choice accepted) | Not at all                                                                                                           |
|                                                                                                                                                                                 | Little                                                                                                               |
|                                                                                                                                                                                 | Quite                                                                                                                |
|                                                                                                                                                                                 | A lot                                                                                                                |
|                                                                                                                                                                                 | Extremely                                                                                                            |
| 44. What do you mostly worry about?<br>(multiple choice accepted)                                                                                                               | I don't know when this emergency situation will end                                                                  |
|                                                                                                                                                                                 | Reduced follow-up by Health Services for my disabled child/children                                                  |
|                                                                                                                                                                                 | Worsened sanitary assistance provided to my child                                                                    |
|                                                                                                                                                                                 | The consequences of the need of new procedures and new devices for safety and infection prevention                   |
|                                                                                                                                                                                 | The chance of reducing supports for school, educational or recreational activities for my disabled child/children    |
|                                                                                                                                                                                 | Nothing                                                                                                              |
| 45. Which steps have been taken by health professionals during this period?<br>(multiple choice accepted)                                                                       | Phone or videocalls by the physician or the physiotherapist to check the situation and collect any need              |
|                                                                                                                                                                                 | Telerehabilitation by videocalls or sending exercise schedules                                                       |
|                                                                                                                                                                                 | Telerehabilitation by online activities or apps                                                                      |
|                                                                                                                                                                                 | Phone or videocalls by professionals or volunteers from associations or educational/recreational communities         |
|                                                                                                                                                                                 | Educational/recreational activities remotely offered by volunteers or professionals from associations or communities |
|                                                                                                                                                                                 | Schoolwork requested by the teachers                                                                                 |
|                                                                                                                                                                                 | Nothing                                                                                                              |

|                                                                                                                                                                     |                                                                                                                                                              |
|---------------------------------------------------------------------------------------------------------------------------------------------------------------------|--------------------------------------------------------------------------------------------------------------------------------------------------------------|
| 46. Which aids do you think could help you during COVID-19 pandemic?<br><i>(multiple choice accepted)</i>                                                           | Increased opportunity to reach my child/children's physician or physiotherapist, by phone or videocalls                                                      |
|                                                                                                                                                                     | Opportunity to have phone or videocalls for psychological support                                                                                            |
|                                                                                                                                                                     | More support to my disabled child/children for schoolwork                                                                                                    |
|                                                                                                                                                                     | More support by volunteers or professionals from communities or associations usually attended by my child/children                                           |
|                                                                                                                                                                     | Other options                                                                                                                                                |
|                                                                                                                                                                     | Nothing                                                                                                                                                      |
| 47. How do you think will the rehabilitative, educational and recreational activities be reorganized after COVID-19 emergency?<br><i>(multiple choice accepted)</i> | It would be useful to check the health situation of my child/children, with physician or physiotherapist, for any new needs                                  |
|                                                                                                                                                                     | It would be useful to have the opportunity to express and share concerns and fears felt in this period                                                       |
|                                                                                                                                                                     | I realize that there may be difficulties in reorganizing the rehabilitation connected activities, because of cautions and safety measures linked to COVID-19 |
|                                                                                                                                                                     | I realize that it will take some time to restart activities                                                                                                  |
|                                                                                                                                                                     | I haven't thought about it                                                                                                                                   |
| 48. Do you think there could be any positive effect resulting from the COVID-19 emergency?<br><i>(multiple choice accepted)</i>                                     | Improvement of communication with physicians, physiotherapists, other professionals                                                                          |
|                                                                                                                                                                     | Slowing down with job-home-recreational activities                                                                                                           |
|                                                                                                                                                                     | No improvement                                                                                                                                               |
|                                                                                                                                                                     | Other options                                                                                                                                                |
| 49. If you want you can write any additional personal comments                                                                                                      | .....                                                                                                                                                        |

**Supplementary Table S2.** Adolescent survey

|                                                                                                                              |                                                                                       |
|------------------------------------------------------------------------------------------------------------------------------|---------------------------------------------------------------------------------------|
| 1. Age                                                                                                                       | 13-15 y.o.                                                                            |
|                                                                                                                              | 16-18 y.o.                                                                            |
|                                                                                                                              | > 18 y.o.                                                                             |
| 2. Sex                                                                                                                       | Male                                                                                  |
|                                                                                                                              | Female                                                                                |
| 3. How many sisters/brothers?                                                                                                | One/ Two/ Three/ Four                                                                 |
|                                                                                                                              | Five or more                                                                          |
|                                                                                                                              | None                                                                                  |
| 4. Which difficulties connected to your disability?                                                                          | Difficulties in motor activities as walking, standing (motor disability)              |
|                                                                                                                              | Difficulties in seeing (visual disability)                                            |
|                                                                                                                              | Difficulties in hearing (hearing disability)                                          |
|                                                                                                                              | Difficulties in accomplishing activities as peers                                     |
|                                                                                                                              | Difficulties in playing with my schoolmates or with people that I'm not familiar with |
|                                                                                                                              | Difficulties in schoolwork                                                            |
|                                                                                                                              | Other difficulties                                                                    |
|                                                                                                                              | None                                                                                  |
| 5. Which activities were you used to attend before the the lockdown due to COVID-19 emergency?<br>(multiple answers allowed) | School                                                                                |
|                                                                                                                              | Sports or other recreational activities                                               |
|                                                                                                                              | Day-time community services                                                           |
|                                                                                                                              | Physiotherapy                                                                         |
| 6. Which of these activities do you miss the most?<br>(multiple answers allowed)                                             | School                                                                                |
|                                                                                                                              | Sports or other recreational activities                                               |
|                                                                                                                              | Day-time community services                                                           |
|                                                                                                                              | Physiotherapy                                                                         |
|                                                                                                                              | Other                                                                                 |
|                                                                                                                              | None                                                                                  |
| 7. Has the stopping of these activities induced any positive effect?<br>(multiple answers allowed)                           | Yes, more time spending with relatives                                                |
|                                                                                                                              | Yes, more time to carry out my preferred home activities                              |
|                                                                                                                              | Yes, more time to chat with friends by tablet                                         |
|                                                                                                                              | Yes, more time to talk with friends by smartphone                                     |
|                                                                                                                              | Yes, more time to play games                                                          |
|                                                                                                                              | Yes, other reasons                                                                    |
|                                                                                                                              | None                                                                                  |
| 8. Has the stopping of these activities induced any negative effect?<br>(multiple answers allowed)                           | Yes, attending school lessons online                                                  |
|                                                                                                                              | Yes, lockdown at home, all together, all the time                                     |
|                                                                                                                              | Yes, being forbidden to meet friends                                                  |

|                                                                                                             |                                                                      |
|-------------------------------------------------------------------------------------------------------------|----------------------------------------------------------------------|
|                                                                                                             | Yes, being forbidden to do sports or my preferred free-time activity |
|                                                                                                             | Yes, being prohibited to get out                                     |
|                                                                                                             | Yes, other reasons                                                   |
|                                                                                                             | None                                                                 |
| 9. Do you have a place to stay by yourself, without excessive stress?                                       | Yes                                                                  |
|                                                                                                             | No                                                                   |
| 10. Are you pleased enough of how you are spending your time during this lockdown?                          | Not at all                                                           |
|                                                                                                             | Little                                                               |
|                                                                                                             | Quite                                                                |
|                                                                                                             | A lot                                                                |
| 11. Have you heard about financial difficulty since the beginning of COVID-19 emergency?                    | Yes                                                                  |
|                                                                                                             | No                                                                   |
| 12. Do you know someone who contracted COVID-19?<br>(multiple answers allowed)                              | Me                                                                   |
|                                                                                                             | One or more relatives                                                |
|                                                                                                             | One or more friends or acquaintances                                 |
|                                                                                                             | No                                                                   |
| 13. Are you worried about contracting COVID-19?                                                             | Not at all                                                           |
|                                                                                                             | Little                                                               |
|                                                                                                             | Quite                                                                |
|                                                                                                             | A lot                                                                |
|                                                                                                             | Extremely                                                            |
| 14. Are you worried that one of your relatives may contract COVID-19?                                       | Not at all                                                           |
|                                                                                                             | Little                                                               |
|                                                                                                             | Quite                                                                |
|                                                                                                             | A lot                                                                |
|                                                                                                             | Extremely                                                            |
| 15. How much do you think your relatives are worried of contracting COVID-19?                               | Not at all                                                           |
|                                                                                                             | Little                                                               |
|                                                                                                             | Quite                                                                |
|                                                                                                             | A lot                                                                |
|                                                                                                             | Extremely                                                            |
| 16. Which of the following emotions do you feel when thinking about COVID-19?<br>(multiple answers allowed) | Fear                                                                 |
|                                                                                                             | Anxiety                                                              |
|                                                                                                             | Concern                                                              |
|                                                                                                             | Sadness                                                              |
|                                                                                                             | Anger                                                                |
|                                                                                                             | Never                                                                |
|                                                                                                             | Some days                                                            |

|                                                                                               |                         |
|-----------------------------------------------------------------------------------------------|-------------------------|
| 17. How frequently have you felt more nervous and/or anxious, in the past month?              | More than half the days |
|                                                                                               | Nearly every day        |
| 18. How frequently have you worried about schoolwork, in the past month?                      | Never                   |
|                                                                                               | Some days               |
|                                                                                               | More than half the days |
|                                                                                               | Nearly every day        |
| 19. Are you worried about the lasting of this emergency situation?                            | Never                   |
|                                                                                               | Some days               |
|                                                                                               | More than half the days |
|                                                                                               | Nearly every day        |
| 20. Have you complained difficulties because of your disability in this period?               | Never                   |
|                                                                                               | Some days               |
|                                                                                               | More than half the days |
|                                                                                               | Nearly every day        |
| 21. Have you felt stressed because of restricted spaces and seclusion in your home?           | Never                   |
|                                                                                               | Some days               |
|                                                                                               | More than half the days |
|                                                                                               | Nearly every day        |
| 22. Have you perceived difficulties in the relationships with your relatives, in this period? | Never                   |
|                                                                                               | Some days               |
|                                                                                               | More than half the days |
|                                                                                               | Nearly every day        |
| 23. Have you experienced fear that something terrible could happen?                           | Never                   |
|                                                                                               | Some days               |
|                                                                                               | More than half the days |
|                                                                                               | Nearly every day        |
| 24. Have you felt oppressed by a sense of boredom or emptiness?                               | Never                   |
|                                                                                               | Some days               |
|                                                                                               | More than half the days |
|                                                                                               | Nearly every day        |
| 25. Have you had difficulties in relaxing?                                                    | Never                   |
|                                                                                               | Some days               |
|                                                                                               | More than half the days |
|                                                                                               | Nearly every day        |
| 26. Have you been agitated and unable to stay still?                                          | Never                   |
|                                                                                               | Some days               |
|                                                                                               | More than half the days |
|                                                                                               | Nearly every day        |
| 27. Are you worried about your future?                                                        | Not at all              |

|                                                                                                    |                                                                                                                                                              |
|----------------------------------------------------------------------------------------------------|--------------------------------------------------------------------------------------------------------------------------------------------------------------|
|                                                                                                    | Little                                                                                                                                                       |
|                                                                                                    | Quite                                                                                                                                                        |
|                                                                                                    | A lot                                                                                                                                                        |
|                                                                                                    | Extremely                                                                                                                                                    |
| 28. What are you worried about most, in this period?                                               | Ignoring when this situation will finish                                                                                                                     |
|                                                                                                    | School stop                                                                                                                                                  |
|                                                                                                    | Sport and free-time activities stop                                                                                                                          |
|                                                                                                    | Being forbidden to meet friends                                                                                                                              |
|                                                                                                    | Physiotherapy stop                                                                                                                                           |
|                                                                                                    | Getting sick                                                                                                                                                 |
|                                                                                                    | Some relative or friend getting sick                                                                                                                         |
| 29. Which activities have been proposed to you during this period?<br>(multiple choice accepted)   | Nothing                                                                                                                                                      |
|                                                                                                    | Phone or videocalls by my physician or my physiotherapist to know how I am doing                                                                             |
|                                                                                                    | Telerehabilitation by videocalls or sending exercise schedules                                                                                               |
|                                                                                                    | Telerehabilitation by online activities or apps                                                                                                              |
|                                                                                                    | Phone or videocalls by professionals or volunteers from associations or educational/recreational communities                                                 |
|                                                                                                    | Educational/recreational activities remotely offered by volunteers or professionals from associations or communities                                         |
|                                                                                                    | Schoolwork requested by the teachers                                                                                                                         |
| 30. Which aids do you think could help you during COVID-19 pandemic?<br>(multiple choice accepted) | Nothing                                                                                                                                                      |
|                                                                                                    | Phone or videocalls to reach my physician or physiotherapist                                                                                                 |
|                                                                                                    | Phone or videocalls for psychological support                                                                                                                |
|                                                                                                    | More support for schoolwork                                                                                                                                  |
|                                                                                                    | Phone or videocalls from volunteers or professionals from communities or supporting associations                                                             |
|                                                                                                    | Other options                                                                                                                                                |
| 31. What do you think could be done after COVID-19 emergency?<br>(multiple choice accepted)        | Nothing                                                                                                                                                      |
|                                                                                                    | It would be useful to check my health situation with my physician or physiotherapist                                                                         |
|                                                                                                    | It would be useful to have the opportunity to express and share concerns and fears felt in this period                                                       |
|                                                                                                    | I realize that there may be difficulties in reorganizing the rehabilitation connected activities, because of cautions and safety measures linked to COVID-19 |
|                                                                                                    | I realize that it will take some time to restart activities                                                                                                  |
|                                                                                                    | I haven't thought about it                                                                                                                                   |

|                                                                                                                              |                                     |
|------------------------------------------------------------------------------------------------------------------------------|-------------------------------------|
| 32. Do you think there could be any improvements resulting from the COVID-19 emergency?<br><i>(multiple choice accepted)</i> | Improvement of friendships          |
|                                                                                                                              | Improvement of family relationships |
|                                                                                                                              | No improvement                      |
|                                                                                                                              | Other options                       |
| 33. If you want you can write any additional personal comments                                                               | .....                               |
